# Supplementary material
Source: HighWire-hosted journal article supplement (https://bmjopen.bmj.com/content/10/10/e033937)
Supplement: inline-supplementary-material-1 [file inline-supplementary-material-1.pdf]

Supplementary Table 1. Baseline functional performance of nursing home residents, by required care level

| Baseline functional performance                        | Required Care Level 3<br>(n=239, 23.9%) | Required Care Level 4<br>(n=395, 39.5%) | Required Care Level 5<br>(n=366, 36.6%) | Total<br>(n=1,000) |
|--------------------------------------------------------|-----------------------------------------|-----------------------------------------|-----------------------------------------|--------------------|
| <b>ADL</b>                                             |                                         |                                         |                                         |                    |
| 1. Basic posture control                               |                                         |                                         |                                         |                    |
| 1-1 Maintaining standing position                      | 42.90%                                  | 14.90%                                  | 6.20%                                   | 18.40%             |
| 1-2 Moving between sitting positions                   | 76.90%                                  | 44.20%                                  | 17.90%                                  | 42.30%             |
| 1-3 Maintaining sitting position (without assistance)  | 68.80%                                  | 36.10%                                  | 11.80%                                  | 34.90%             |
| 1-4 Rolling over                                       | 81.70%                                  | 54.80%                                  | 20.80%                                  | 48.70%             |
| 2. Walking and moving function                         |                                         |                                         |                                         |                    |
| 2-1 Going out                                          | 1.70%                                   | 1.00%                                   | 0.60%                                   | 1.00%              |
| 2-2 Climbing up and down                               | 4.30%                                   | 0.30%                                   | 0.80%                                   | 1.40%              |
| 2-3 Stable walking                                     | 42.90%                                  | 14.80%                                  | 3.90%                                   | 17.50%             |
| 2-4 Moving within facility                             | 85.30%                                  | 61.70%                                  | 31.40%                                  | 56.20%             |
| 3. Eating function - Swallowing                        |                                         |                                         |                                         |                    |
| 3-1 Chewing                                            | 76.60%                                  | 53.40%                                  | 24.10%                                  | 48.30%             |
| 3-2 Sucking                                            | 86.00%                                  | 70.20%                                  | 39.40%                                  | 62.80%             |
| 3-3 Swallowing (solid)                                 | 92.20%                                  | 81.20%                                  | 53.60%                                  | 73.80%             |
| 3-4 Swallowing (specialty processed food)              | 93.40%                                  | 82.30%                                  | 70.90%                                  | 80.60%             |
| 4. Eating function – Feeding and feeding assistance    |                                         |                                         |                                         |                    |
| 4-1 Feeding him/herself                                | 71.40%                                  | 47.40%                                  | 13.30%                                  | 40.90%             |
| 4-2 Dropping food and making mess                      | 68.10%                                  | 68.90%                                  | 31.50%                                  | 54.80%             |
| 4-3 Special arrangement for feeding                    | 29.60%                                  | 49.10%                                  | 56.80%                                  | 47.10%             |
| 4-4 Direct assistance for feeding                      | 8.70%                                   | 22.50%                                  | 64.80%                                  | 34.60%             |
| 5. Toileting function                                  |                                         |                                         |                                         |                    |
| 5-1 Post-release cleanup                               | 50.60%                                  | 28.20%                                  | 16.90%                                  | 29.40%             |
| 5-2 Dressing and undressing                            | 56.50%                                  | 18.60%                                  | 4.20%                                   | 22.30%             |
| 5-3 Getting on and off western type toilet             | 65.20%                                  | 48.00%                                  | 19.10%                                  | 41.40%             |
| 5-4 Releasing on bed                                   | 17.90%                                  | 34.40%                                  | 49.40%                                  | 36.00%             |
| 6. Bathing function                                    |                                         |                                         |                                         |                    |
| 6-1 Stable movement in and out of bathtub and washing. | 16.20%                                  | 3.40%                                   | 1.10%                                   | 5.60%              |
| 6-2 Bathing without assistance                         | 7.50%                                   | 3.70%                                   | 0.90%                                   | 3.50%              |
| 6-3 Maintaining sitting position during bathing        | 74.30%                                  | 52.00%                                  | 20.10%                                  | 45.70%             |
| 6-4 Carrying out bathing                               | 50.70%                                  | 70.20%                                  | 89.20%                                  | 72.60%             |
| 7. Personal care function - Oral care                  |                                         |                                         |                                         |                    |
| 7-1 General oral care                                  | 48.70%                                  | 26.00%                                  | 6.50%                                   | 24.30%             |
| 7-2 Brushing teeth                                     | 39.30%                                  | 15.90%                                  | 4.00%                                   | 17.10%             |
| 7-3 Preparation for brushing teeth                     | 66.40%                                  | 45.00%                                  | 14.70%                                  | 38.80%             |
| 7-4 Rinsing mouth                                      | 79.20%                                  | 58.30%                                  | 20.50%                                  | 49.00%             |
| 8. Personal care function – Self-care                  |                                         |                                         |                                         |                    |
| 8-1 Trimming nails                                     | 3.90%                                   | 2.90%                                   | 1.10%                                   | 2.50%              |
| 8-2 Shaving, skincare, hair care                       | 48.30%                                  | 27.20%                                  | 5.40%                                   | 24.30%             |
| 8-3 Washing face                                       | 71.90%                                  | 47.00%                                  | 14.40%                                  | 41.00%             |
| 8-4 Washing hands                                      | 55.00%                                  | 35.00%                                  | 9.10%                                   | 30.30%             |
| <b>Cognitive Functions</b>                             |                                         |                                         |                                         |                    |
| 9. Orientation                                         |                                         |                                         |                                         |                    |
| 9-1 Date                                               | 43.30%                                  | 22.00%                                  | 7.60%                                   | 21.80%             |
| 9-2 Name of place                                      | 48.10%                                  | 31.70%                                  | 11.20%                                  | 28.00%             |
| 9-3 Orientation toward other people                    | 84.50%                                  | 69.80%                                  | 36.60%                                  | 61.20%             |
| 9-4 Own name                                           | 98.20%                                  | 89.80%                                  | 59.00%                                  | 80.50%             |
| 10. Communication                                      |                                         |                                         |                                         |                    |
| 10-1 Maintaining complicated human relationship        | 54.10%                                  | 36.80%                                  | 12.90%                                  | 32.20%             |
| 10-2 Understanding of written language                 | 70.10%                                  | 50.80%                                  | 17.90%                                  | 43.30%             |
| 10-3 Everyday conversation                             | 60.60%                                  | 46.60%                                  | 18.90%                                  | 39.80%             |
| 10-4 Understanding of spoken language                  | 82.00%                                  | 74.40%                                  | 40.60%                                  | 63.80%             |
| 11. Cognitive function                                 |                                         |                                         |                                         |                    |
| 11-1 Time management                                   | 38.20%                                  | 24.00%                                  | 6.50%                                   | 21.00%             |
| 11-2 Simple arithmetic                                 | 57.60%                                  | 36.00%                                  | 10.40%                                  | 31.70%             |
| 11-3 Long-term memory                                  | 44.20%                                  | 35.10%                                  | 12.40%                                  | 28.90%             |
| 11-4 State of consciousness                            | 5.60%                                   | 7.60%                                   | 5.70%                                   | 6.40%              |
| <b>Social Participation</b>                            |                                         |                                         |                                         |                    |
| 12. Leisure                                            |                                         |                                         |                                         |                    |
| 12-1 Traveling                                         | 1.30%                                   | 11.10%                                  | 0.60%                                   | 0.50%              |
| 12-2 Conducting personal hobby activities              | 22.00%                                  | 56.90%                                  | 3.40%                                   | 10.90%             |
| 12-3 Group Recreation                                  | 73.00%                                  | 63.70%                                  | 30.20%                                  | 51.00%             |
| 12-4 Watching TV                                       | 75.00%                                  | 4.50%                                   | 38.40%                                  | 57.10%             |
| 13. Socializing                                        |                                         |                                         |                                         |                    |
| 13-1 Socializing using means of communication devices  | 10.00%                                  | 7.10%                                   | 2.30%                                   | 5.00%              |
| 13-2 Going out                                         | 11.40%                                  | 35.20%                                  | 4.90%                                   | 7.30%              |
| 13-3 Conversing with friend                            | 50.90%                                  | 87.10%                                  | 15.50%                                  | 31.70%             |
| 13-4 Conversing with someone close                     | 96.90%                                  | 96.90%                                  | 51.90%                                  | 76.50%             |

Proportion of residents capable of each ICF Staging item both in the overall analysis cohort and within residents with a specific required care level. A higher required care level is associated with more limited ability in most items of functional performance. ADLs = Activities of Daily Living

**Supplementary Table 2. Care staff's responses**

|                                                                                                                                            | Median (Interquartile Range) |
|--------------------------------------------------------------------------------------------------------------------------------------------|------------------------------|
| Global Happiness                                                                                                                           |                              |
| Are you happy?<br>(0-10, not happy to very happy)                                                                                          | 7 (6-8)                      |
| Job Satisfaction                                                                                                                           |                              |
| To what extent are you satisfied with you work?<br>(1-6, not at all to extremely)                                                          | 4 (4-5)                      |
| Career rewards                                                                                                                             |                              |
| How rewarding is your work?<br>(1-6, not at all to etremely)                                                                               | 5 (4-5)                      |
| Frequency of Intentions to leave                                                                                                           |                              |
| How often do you feel you want leave from the current care facilities? (1-4, often to not at all)                                          | 2 (2-3)                      |
| Quality of care at the nursing home                                                                                                        |                              |
| To what extent are you satisfied with the quality of care provided at the nursing home at which you work?<br>(1-5, not at all to etremely) | 4 (3-4)                      |
| To what extent would you recommend this nursing home at which you work to your family and friends?<br>(1-5, not at all to extremely)       | 4 (3-4)                      |

Distribution of care staff's responses (N=412). This analysis was conducted in the unit of care staff members, not residents. Responses to the questions regardng global happiness and job stisfaction were summarized at each facility and used in the following correlation analysis.

**Supplementary Table 3. Global happiness and job satisfaction of care staff**

|                  | Required Care<br>Level 3<br>(n=239, 23.9%) | Required Care<br>Level 4<br>(n=395, 39.5%) | Required Care<br>Level 5<br>(n=366, 36.6%) | Total<br>(n=1,000) |
|------------------|--------------------------------------------|--------------------------------------------|--------------------------------------------|--------------------|
| Job Satisfaction | 47.70%                                     | 51.40%                                     | 51.90%                                     | 50.70%             |
| Global Happiness | 59.00%                                     | 55.40%                                     | 47.80%                                     | 53.50%             |

Distribution of care staff's responses. This analysis was conducted in the unit of residents (N=1,000). Job satisfaction and happiness are represented by facility-level binary indicators (1 if the proportion of above-threshold responses is equal to or above the across-facilities median, 0 if it is below median). Note that these responses do not reflect experience of care workers with each resident, but their overall experience at the facility.

**Supplementary Table 4. Occurrence of the risk events in six months, by required care level**

| Risk events      | Required Care<br>Level 3<br>(n=239, 23.9%) | Required Care<br>Level 4<br>(n=395, 39.5%) | Required Care<br>Level 5<br>(n=366, 36.6%) | Total<br>(n=1,000, 100.0%) |
|------------------|--------------------------------------------|--------------------------------------------|--------------------------------------------|----------------------------|
| Falls            | 22.60%                                     | 13.90%                                     | 12.80%                                     | 15.60%                     |
| Pressure ulcers  | 1.70%                                      | 2.80%                                      | 2.70%                                      | 2.50%                      |
| Aspiration pneum | 1.70%                                      | 2.30%                                      | 2.70%                                      | 2.30%                      |
| Fever            | 17.60%                                     | 15.20%                                     | 22.10%                                     | 18.30%                     |

The most common undesirable risk events among the residents in the six-month period of observation were fever (18.3%) and falls (15.6%). Incidence of new pressure ulcers and aspiration pneumonia were relatively low.

Supplementary Table 5. Overlap of improvement and deterioration

|                  | Required Care Level 3<br>(n=239, 23.9%) |              |        | Required Care Level 4<br>(n=395, 39.5%) |              |        | Required Care Level 5<br>(n=366, 36.6%) |              |        | Total<br>(n=1,000, 100.0%) |              |        |
|------------------|-----------------------------------------|--------------|--------|-----------------------------------------|--------------|--------|-----------------------------------------|--------------|--------|----------------------------|--------------|--------|
|                  | Improved                                | Not improved | Total  | Improved                                | Not improved | Total  | Improved                                | Not improved | Total  | Improved                   | Not improved | Total  |
| Deteriorated     | 10.9%                                   | 16.7%        | 27.6%  | 6.1%                                    | 16.7%        | 22.8%  | 4.9%                                    | 15.3%        | 20.2%  | 6.8%                       | 16.2%        | 23.0%  |
| Not deteriorated | 8.8%                                    | 63.6%        | 72.4%  | 6.1%                                    | 71.1%        | 77.2%  | 3.8%                                    | 76.0%        | 79.8%  | 5.9%                       | 71.1%        | 77.0%  |
| Total            | 19.7%                                   | 80.3%        | 100.0% | 12.2%                                   | 87.9%        | 100.0% | 8.7%                                    | 91.3%        | 100.0% | 12.7%                      | 87.3%        | 100.0% |

The number shows the percentage of each subgroup by required care levels.

**Supplementary Table 6a. Correlation of deterioration in functional performance with resident features and risk events**

|                      | Required Care<br>Level 3<br>(n=239, 23.9%) | Required Care<br>Level 4<br>(n=395, 39.5%) | Required Care<br>Level 5<br>(n=366, 36.6%) | Total<br>(n=1,000)      |
|----------------------|--------------------------------------------|--------------------------------------------|--------------------------------------------|-------------------------|
| Resident features    |                                            |                                            |                                            |                         |
| Sex                  |                                            |                                            |                                            |                         |
| Male                 | 0.64 (0.31-1.34)                           | 1.49 (0.86-2.60)                           | 1.33 (0.69-2.53)                           | 1.17 (0.81-1.68)        |
| Age groups, in years |                                            |                                            |                                            |                         |
| <80                  | 1.00 (reference)                           | 1.00 (reference)                           | 1.00 (reference)                           | 1.00 (reference)        |
| 80-84                | 2.09 (0.67-6.49)                           | 0.57 (0.23-1.43)                           | 0.58 (0.23-1.52)                           | 0.82 (0.48-1.42)        |
| 85-89                | 1.31 (0.46-3.73)                           | 1.01 (0.51-2.02)                           | 1.07 (0.49-2.32)                           | 1.09 (0.69-1.73)        |
| 90-94                | 1.36 (0.48-3.79)                           | 0.90 (0.43-1.88)                           | 1.62 (0.74-3.53)                           | 1.23 (0.77-1.95)        |
| 95+                  | 2.93 (0.90-9.60)                           | 1.33 (0.63-2.81)                           | 1.46 (0.60-3.55)                           | 1.62 (0.97-2.71)        |
| Risk events          |                                            |                                            |                                            |                         |
| Fall                 | <b>2.20 (1.16-4.18)</b>                    | 2.00 (1.08-3.70)                           | <b>2.60 (1.35-5.04)</b>                    | <b>2.31 (1.60-3.33)</b> |
| Pressure ulcers      | 2.67 (0.37-19.4)                           | 1.98 (0.57-6.92)                           | -                                          | 1.06 (0.42-2.68)        |
| Aspiration pneumonia | 2.67 (0.37-19.4)                           | <b>7.19 (1.76-29.40)</b>                   | 0.43(0.05-3.45)                            | 2.20 (0.94-5.15)        |
| Fever                | <b>2.33 (1.17-4.65)</b>                    | 1.72 (0.94-3.15)                           | 1.53 (0.86-2.74)                           | <b>1.74 (1.22-2.48)</b> |

Unadjusted odds ratios, obtained through bivariate correlation analysis, with their 95% confidence intervals.

Residents who had either a fall or fever were more likely to deteriorate.

Odds ratios of care staff job satisfaction and global happiness are presented in Tables 4a.

**Supplementary Table 6b. Multivariable logistic regression analysis for deterioration in residents' functional performance**

|                      | Required Care<br>Level 3<br>(n=239, 23.9%) | Required Care<br>Level 4<br>(n=395, 39.5%) | Required Care<br>Level 5<br>(n=366, 36.6%) | Total<br>(n=1,000)      |
|----------------------|--------------------------------------------|--------------------------------------------|--------------------------------------------|-------------------------|
| Resident features    |                                            |                                            |                                            |                         |
| Sex                  |                                            |                                            |                                            |                         |
| Male                 | 0.71 (0.32-1.61)                           | 1.43 (0.78-2.62)                           | 1.70 (0.85-3.40)                           | 1.31 (0.89-1.93)        |
| Age groups, in years |                                            |                                            |                                            |                         |
| <80                  | 1.00 (reference)                           | 1.00 (reference)                           | 1.00 (reference)                           | 1.00 (reference)        |
| 80-84                | 1.88 (0.57-6.28)                           | 0.51 (0.20-1.34)                           | 0.64 (0.24-1.34)                           | 0.84 (0.48-1.47)        |
| 85-89                | 1.16 (0.38-3.52)                           | 0.84 (0.40-1.76)                           | 1.18 (0.53-2.65)                           | 1.07 (0.66-1.72)        |
| 90-94                | 1.42 (0.41-4.98)                           | 0.89 (0.40-1.97)                           | 1.83 (0.81-4.15)                           | 1.25 (0.77-2.04)        |
| 95+                  | 2.08 (0.57-7.55)                           | 1.20 (0.53-2.70)                           | 1.47 (0.58-3.73)                           | 1.54 (0.90-2.64)        |
| Risk events          |                                            |                                            |                                            |                         |
| Fall                 | <b>2.12 (1.06-4.29)</b>                    | <b>2.08 (1.06-4.07)</b>                    | <b>2.38 (1.19-4.79)</b>                    | <b>2.25 (1.54-3.29)</b> |
| Pressure ulcers      | 1.25 (0.13-11.67)                          | 1.92 (0.50-7.45)                           | 0.26 (0.03-2.25)                           | 0.90 (0.34-2.38)        |
| Aspiration pneumonia | 2.71 (0.34-21.49)                          | <b>5.25 (1.14-24.27)</b>                   | -                                          | 1.40 (0.57-3.39)        |
| Fever                | <b>2.79 (1.27-6.10)</b>                    | 1.69 (0.86-3.35)                           | 0.66 (0.87-3.18)                           | <b>1.81 (1.24-2.66)</b> |

Adjusted odds ratios, obtained through multivariable logistic regression analysis, with their 95% confidence intervals.

The adjusted odds ratios of care staff's job satisfaction and happiness are presented in Table 4b.

**Supplementary Table 7a. Correlation of improvement in functional performance with resident features and risk events**

|                      | Required Care<br>Level 3<br>(n=239, 23.9%) | Required Care<br>Level 4<br>(n=395, 39.5%) | Required Care<br>Level 5<br>(n=366, 36.6%) | Total<br>(n=1,000)      |
|----------------------|--------------------------------------------|--------------------------------------------|--------------------------------------------|-------------------------|
| Resident features    |                                            |                                            |                                            |                         |
| Sex                  |                                            |                                            |                                            |                         |
| Male                 | 0.82 (0.37-1.83)                           | 1.55 (0.78-3.10)                           | 1.42 (0.59-3.45)                           | 1.27 (0.81-1.99)        |
| Age groups, in years |                                            |                                            |                                            |                         |
| <80                  | 1.00 (reference)                           | 1.00 (reference)                           | 1.00 (reference)                           | 1.00 (reference)        |
| 80-84                | 2.25 (0.61-8.23)                           | 2.37 (0.79-7.10)                           | 1.31 (0.34-5.10)                           | 2.00 (0.99-4.03)        |
| 85-89                | 1.65 (0.50-5.52)                           | 1.45 (0.52-4.04)                           | 1.60 (0.47-5.40)                           | 1.66 (0.86-3.18)        |
| 90-94                | 1.65 (0.50-5.41)                           | 1.02 (0.33-3.18)                           | 2.15 (0.63-7.33)                           | 1.75 (0.90-3.39)        |
| 95+                  | 1.18 (0.26-5.28)                           | 3.19 (1.15-8.84)                           | 1.92 (0.49-7.55)                           | 2.29 (1.13-4.63)        |
| Risk events          |                                            |                                            |                                            |                         |
| Fall                 | <b>2.37 (1.19-4.76)</b>                    | 2.05 (0.97-4.31)                           | 2.06 (0.84-5.07)                           | <b>2.36 (1.53-3.65)</b> |
| Pressure ulcers      | 4.22(0.58-30.79)                           | 0.72 (0.09-5.73)                           | 1.16 (0.14-9.50)                           | 1.32 (0.45-3.91)        |
| Aspiration pneumonia | 1.37 (0.14-13.47)                          | <b>2.11 (0.43-10.47)</b>                   | -                                          | 1.03 (0.30-3.52)        |
| Fever                | 2.15 (1.01-4.56)                           | 0.78 (0.31-1.91)                           | 1.19 (0.51-2.76)                           | 1.24 (0.78-1.96)        |

Unadjusted odds ratios, obtained through bivariate correlation analysis, with their 95% confidence intervals.

Residents who had a fall were more likely to improve than those who did not have a fall, which might be partly because of rehabilitation after the fall.

Odds ratios of care staff job satisfaction and global happiness are presented in Tables 4b.



**Supplementary Tabel 7b. Multivariable logistic regression analysis for improvement in residents' functional performance**

|                      | Required Care<br>Level 3<br>(n=239, 23.9%) | Required Care<br>Level 4<br>(n=395, 39.5%) | Required Care<br>Level 5<br>(n=366, 36.6%) | Total<br>(n=1,000)      |
|----------------------|--------------------------------------------|--------------------------------------------|--------------------------------------------|-------------------------|
| Resident features    |                                            |                                            |                                            |                         |
| Sex                  |                                            |                                            |                                            |                         |
| Male                 | 1.05 (0.44-2.51)                           | 2.04 (0.95-4.40)                           | 1.87 (0.74-4.76)                           | 1.52 (0.95-2.45)        |
| Age groups, in years |                                            |                                            |                                            |                         |
| <80                  | 1.00 (reference)                           | 1.00 (reference)                           | 1.00 (reference)                           | 1.00 (reference)        |
| 80-84                | 2.10 (0.54-8.09)                           | 3.06 (0.97-9.75)                           | 1.45 (0.36-5.87)                           | <b>2.24 (1.09-4.60)</b> |
| 85-89                | 1.55 (0.45-5.42)                           | 1.72 (0.58-5.11)                           | 1.85 (0.53-6.53)                           | 1.75 (0.90-3.43)        |
| 90-94                | 1.42 (0.41-4.98)                           | 1.50 (0.44-5.07)                           | 2.62 (0.73-9.35)                           | 1.94 (0.98-3.85)        |
| 95+                  | 0.80 (0.16-4.13)                           | <b>5.12 (1.65-15.88)</b>                   | 2.13 (0.52-8.73)                           | <b>2.38 (1.14-4.96)</b> |
| Risk events          |                                            |                                            |                                            |                         |
| Fall                 | 2.08 (0.98-4.45)                           | 2.10 (0.92-4.83)                           | 1.97 (0.77-5.08)                           | <b>2.36 (1.51-3.70)</b> |
| Pressure ulcers      | 2.86 (0.32-25.16)                          | 0.70 (0.07-6.94)                           | 1.39 (0.77-5.08)                           | 1.07 (0.35-3.26)        |
| Aspiration pneumonia | 1.46 (0.13-16.49)                          | 2.75 (0.45-16.79)                          | -                                          | 0.78 (0.22-2.81)        |
| Fever                | 2.00 (0.86-4.67)                           | 0.51 (0.19-1.38)                           | 1.30 (0.53-3.21)                           | 1.15 (0.70-1.87)        |

Adjusted odds ratios, obtained through multivariable logistic regression analysis, with their 95% confidence intervals.

The adjusted odds ratios of care staff's job satisfaction and happiness are presented in Table 5b.

**Supplementary Table 8a. Correlation between deterioration in subdomains of functional performance and staff QWL**

|                  | ADL              | Cognitive Function | Social Participation |
|------------------|------------------|--------------------|----------------------|
| Job Satisfaction | 0.91 (0.65-1.28) | 0.80 (0.48-1.32)   | 0.86 (0.61-1.20)     |
| Global Happiness | 0.72 (0.52-1.02) | 0.86 (0.52-1.42)   | 0.92 (0.55-1.56)     |

**Appendix Table 8b. Correlation between improvement in subdomains of functional performance and staff QWL**

|                  | ADL              | Cognitive Function | Social Participation |
|------------------|------------------|--------------------|----------------------|
| Job Satisfaction | 0.99 (0.62-1.59) | 1.06 (0.56-2.01)   | 1.97 (0.89-4.36)     |
| Global Happiness | 1.06 (0.66-1.69) | 0.71 (0.37-1.34)   | 1.06 (0.73-1.54)     |

Unadjusted odds ratios, obtained through bivariate correlation analysis, with their 95% confidence intervals.

Job satisfaction and happiness are represented by facility-level binary indicators (1 if the proportion of above-threshold responses is equal to or above the across-facilities median, 0 if it is below median).

These analyses were for seeking a specific subdomain of functional performance which was correlated with care staff's job satisfaction or happiness. However, no significant correlation was observed in the subdomains, presumably due to limited number of events (limited number of residents with deterioration in each of the subdomains).

**Supplementary Table 9. Results of bivariate correlation analysis and multivariable logistic regression analysis**

| Deterioration of residents' functional performance                    |                                             |                                   |
|-----------------------------------------------------------------------|---------------------------------------------|-----------------------------------|
|                                                                       | Care staff's job satisfaction and happiness | Resident features and risk events |
| Bivariate correlation analysis                                        | Table 4a                                    | Supplementary Table 6a            |
| Multivariable logistic regression analysis                            | Table 4b                                    | Supplementary Table 6b            |
| Bivariate correlation analysis (subdomains of functional performance) | Supplementary Table 8a                      |                                   |
| Improvement of residents' functional performance                      |                                             |                                   |
|                                                                       | Care staff's job satisfaction and happiness | Resident features and risk events |
| Bivariate correlation analysis                                        | Table 5a                                    | Supplementary Table 7a            |
| Multivariable logistic regression analysis                            | Table 5b                                    | Supplementary Table 7b            |
| Bivariate correlation analysis (subdomains of functional performance) | Supplementary Table 8b                      |                                   |
